# Supplementary material for: Economically advantageous pathways for reducing greenhouse gas emissions from industrial hydrogen under common, current economic conditions
Source: Royal Society of Chemistry journal article supplement (doi:10.1039/d0ee03768k), 2021-01-01

## 1. Basic descriptions of two processes

### 1) via "Sulphuric Acid Vacuum concentration"

- **Typical Process:** Concentrating waste acid from 20% ~ 60% or even lower to 70% ~ 75% by pre-vacuum concentration process; concentrating acid from 70% to 85% by intermediate vacuum concentration; concentrating acid from 85% to 96% ~ 97% by high concentration process.

**Concentration:**  $w(\text{H}_2\text{SO}_4)$  20% →→  $w(\text{H}_2\text{SO}_4)$  70% →→  $w(\text{H}_2\text{SO}_4)$  85%  
→→  $w(\text{H}_2\text{SO}_4)$  95%

#### Phase I pretreatment:

It can be operated at atmospheric pressure or in vacuum. Different materials and types of heaters can be used according to the concentration of waste acid and impurity characters. Multi-effect (or multi-stages) vacuum concentration will undoubtedly save energy, but because multi-effect vacuum concentration will increase the investment cost of equipment, generally it is not recommended to use more than three-effect pre-concentration processes.

**Phase II Intermediate vacuum concentration of sulphuric acid:**  $w(\text{H}_2\text{SO}_4)$  20%  
→→→  $w(\text{H}_2\text{SO}_4)$  85%

Generally, it operates under the absolute pressure of 8 ~ 10Kpa and the operating temperature is 150~180°C. For the devices with high processing capacity, it can be divided into two or more stages to reach the final required product concentrations.

**Phase III Highly concentrated:**  $w(\text{H}_2\text{SO}_4)$  85% →→→  $w(\text{H}_2\text{SO}_4)$  95%

The main equipment is metal tantalum, which is expensive. Steam consumption is huge during this process.

- **About our task:**

For the feed  $w(\text{H}_2\text{SO}_4)$  45%, theoretically, it is possible to be concentrated to various concentrations of acid in the range of 45% ~ 95%.

### 2) via "Spent sulphuric acid regeneration (SAR) process"

- **Process:** thermal decomposition(Fuel must be added) →→ gas clealing →→  
dring&absorbtion →→ convert

**Concentration:**  $w(\text{H}_2\text{SO}_4)$  60% →→→  $w(\text{H}_2\text{SO}_4)$  98%

Generally, the feed concentration should be  $w(\text{H}_2\text{SO}_4) > 60\%$ , because a large amount of water and air are brought into the combustion process. If the feed concentration is low, the heat balance of the conversion process will be affected. At the same time, if the water content is too high, the water balance in the dry suction section will be unbalanced.

➤ **About our task:**

The feed with 45% concentration of (H<sub>2</sub>SO<sub>4</sub>) appears to be low in concentration by the above mentioned SAR method and may be necessary to be concentrated first. Then use SAR process for further concentration and purification.

w (H<sub>2</sub>SO<sub>4</sub>) 45% →→w (H<sub>2</sub>SO<sub>4</sub>) 65% →→w (H<sub>2</sub>SO<sub>4</sub>) 75% 【w (H<sub>2</sub>SO<sub>4</sub>) 85%、w (H<sub>2</sub>SO<sub>4</sub>) 95%】

**Tab.1 Comparison of two processes:**

| comparative content                   | two processes                                                                                                                                                                                                                                                                                                                                                                                                                                                                                                                                                                                                     |                                                                                                                                                                                                                                                  |
|---------------------------------------|-------------------------------------------------------------------------------------------------------------------------------------------------------------------------------------------------------------------------------------------------------------------------------------------------------------------------------------------------------------------------------------------------------------------------------------------------------------------------------------------------------------------------------------------------------------------------------------------------------------------|--------------------------------------------------------------------------------------------------------------------------------------------------------------------------------------------------------------------------------------------------|
|                                       | Sulphuric Acid vacuum Concentration                                                                                                                                                                                                                                                                                                                                                                                                                                                                                                                                                                               | SAR                                                                                                                                                                                                                                              |
| <b>Impurity content in waste acid</b> | It is more suitable for waste acid with low impurity content. It is suggested that it is suitable for small amount of acid and low impurity content.                                                                                                                                                                                                                                                                                                                                                                                                                                                              | Using calciner to incinerate and electrostatic precipitation to remove burning dust, no matter how much impurity content in waste acid, the process can be used to treat the acid to reach high quality acid and it can be used in a wide range. |
| <b>Final product</b>                  | Only sulphuric acid with a concentration of less than 98% can be produced, because 98% of the sulphuric acid is mixed with water during concentration, and only 98% can be achieved regardless of any measures taken. When the waste acid is concentrated, the solid impurities cannot be removed, but the water and volatile organic compounds are evaporated. The concentrated waste acid can only be reused by this product. Due to the recycling of concentrated waste acid, the pipeline is easy to be blocked after a long time, and acid sludge is easy to deposit at the bottom of the acid storage tank. | Different concentrations of waste acid can be produced. Similar to sulphur burning sulphuric acid, the quality of sulphuric acid produced could reach the national standard.                                                                     |
| <b>equipment investment</b>           | The use of tantalum material in the acid evaporating tower, with enamel glass lining in the washing tower, and the investment of the two equipment are relatively high.                                                                                                                                                                                                                                                                                                                                                                                                                                           | The processes from calciner to transformation, and dust removal is gas flow. The equipment volume and pipe size are large, the occupied area (or footprint) is large, and the equipment investment is large.                                     |

|                         |                                            |                                                                                                                                                                                                                          |                                                                                                                                                  |
|-------------------------|--------------------------------------------|--------------------------------------------------------------------------------------------------------------------------------------------------------------------------------------------------------------------------|--------------------------------------------------------------------------------------------------------------------------------------------------|
| <b>operational cost</b> | <b>Daily maintenance of equipment</b>      | Vacuum concentration of waste acid is easy to leak under the condition of unstable temperature control and sharp change of temperature due to the use of some glass equipment pipes.                                     |                                                                                                                                                  |
|                         | <b>industrial wastes management</b>        | It mainly deals with acidic wastewater produced by condensation and acidic wastewater from vacuum pump.                                                                                                                  | Control the content of sulfur dioxide in waste gas, treat or use acid wastewater, and waste residue from electrostatic precipitator.             |
|                         | <b>Site environment and staffing</b>       | Depending on the size of the device, several full-time staff members are required.                                                                                                                                       | The installation site is neat and clean, and the labor intensity of workers is not heavy.                                                        |
|                         | <b>Consumption of waste acid treatment</b> | Steam or heat transfer oil is needed to vaporize water under vacuum condition.                                                                                                                                           | A large amount of natural gas is needed. The calciner temperature is controlled at about 1000 °C , and the water in the waste acid is vaporized. |
|                         | <b>Other consumption</b>                   | Waste acid, low pressure steam, electricity, by-product medium pressure steam, water, deoxidizing water, circulating water, analysis costs, maintenance costs, equipment depreciation, personnel wages, management costs |                                                                                                                                                  |

## 2. investigation of industrial waste acid treatment plant

**Tab.2 Concentration of industrial waste acids from different sources and their usual treatment processes**

| <b>Various kinds of waste acid from different industrial processes</b> | <b>Waste acid concentration</b>                                                                      | <b>Treatment process</b>                                                            |
|------------------------------------------------------------------------|------------------------------------------------------------------------------------------------------|-------------------------------------------------------------------------------------|
| Titanium dioxide waste acid                                            | w (H <sub>2</sub> SO <sub>4</sub> ) 19%~23%                                                          | concentration                                                                       |
| Aromatics nitrification waste acid                                     | w (H <sub>2</sub> SO <sub>4</sub> ) 60%~70%                                                          | concentration                                                                       |
| Dyestuff waste acid                                                    | w (H <sub>2</sub> SO <sub>4</sub> ) 10%~50%                                                          | Partly neutralization<br>“or” concentration                                         |
| Steel cleaning waste acid                                              | w (H <sub>2</sub> SO <sub>4</sub> ) 5%~10%                                                           | Recycling→FeSO <sub>4</sub><br>【Fe <sub>2</sub> (SO <sub>4</sub> ) <sub>3</sub> 】 n |
| Alkylation waste acid                                                  | w (H <sub>2</sub> SO <sub>4</sub> ) 85%~90%                                                          | regeneration (SAR)                                                                  |
| MMA                                                                    | w (H <sub>2</sub> SO <sub>4</sub> ) 40%、<br>w 【(NH <sub>4</sub> ) <sub>2</sub> SO <sub>4</sub> 】 35% | concentration + regeneration<br>(SAR)                                               |
| Hydrofluoric acid drying waste acid                                    | w (H <sub>2</sub> SO <sub>4</sub> ) 75%~85%                                                          | concentration                                                                       |
| Chlor alkali waste acid                                                | w (H <sub>2</sub> SO <sub>4</sub> ) 75%~80%                                                          | concentration “or” Air lift                                                         |

|                                |                                             |                                                                 |
|--------------------------------|---------------------------------------------|-----------------------------------------------------------------|
| Acetylene purifying waste acid | w (H <sub>2</sub> SO <sub>4</sub> ) 80%~90% | concentration “or”<br>regeneration (SAR) “or”<br>neutralization |
|--------------------------------|---------------------------------------------|-----------------------------------------------------------------|

**Tab.3 operational cost of Sulphuric Acid Concentration (45%→→→96%)**

**(A device in Nanjing, china)**

|                           | unit consumption |       | Unit Price |             | Unit cost<br>(yuan/t) |
|---------------------------|------------------|-------|------------|-------------|-----------------------|
| Sulphuric acid 45%        | 2155             | kg/t  |            |             |                       |
| Alkali (in kind)          | 180              | kg/t  | 550        | yuan/1000kg | <b>99</b>             |
| Qing River water          | 200              | kg/t  | 0.85       | yuan/kg     | <b>170</b>            |
| circulating water         | 100              | t/t   | 0.18       | yuan/t      | <b>18</b>             |
| electric                  | 69               | kWh/t | 0.65       | yuan/kWh    | <b>44.85</b>          |
| Medium pressure steam     | 0.45             | t/t   | 150        | yuan/t      | <b>67.5</b>           |
| 1.1MPa                    | 1.2              | t/t   | 140        | yuan/t      | <b>168</b>            |
| Cost analysis             |                  |       |            |             | <b>3</b>              |
| maintenance costs         |                  |       |            |             | <b>10</b>             |
| Depreciation of equipment |                  |       |            |             | <b>20</b>             |
| Personnel wages           |                  |       |            |             | <b>28.7</b>           |
| Management cost           |                  |       |            |             | <b>10</b>             |
| operational cost          |                  |       |            |             | <b>639.05</b>         |

The vacuum concentration process needs two stages of enrichment, from 45% to 65% or 65% to 96%. The operational cost is about 600 yuan / ton (including depreciation).

**Tab.4 operational cost of SAR(45%→→→96%) (A device in Nanjing, China)**

|                                     |        | unit raw material<br>consumption |                    | Unit Price |                      | Unit cost<br>(yuan/t) |
|-------------------------------------|--------|----------------------------------|--------------------|------------|----------------------|-----------------------|
| waste acid                          | 45.00% | 2155                             | kg/t               |            |                      |                       |
| Low pressure steam                  | 0.8MPa | 80                               | kg/t               | 130        | yuan/1000kg          | <b>10.4</b>           |
| electric                            |        | 95                               | kWh/t              | 0.65       | yuan/kWh             | <b>61.75</b>          |
| By-product medium<br>pressure steam | 3.2MPa | -800                             | kg/t               | 150        | yuan/1000kg          | <b>-120</b>           |
| Qingjiang River water               |        | 500                              | kg/t               | 0.85       | yuan/1000kg          | <b>0.425</b>          |
| De-oxygen water                     |        | 1160                             | kg/t               | 24         | yuan/1000kg          | <b>27.84</b>          |
| circulating water                   |        | 82000                            | kg/t               | 0.18       | yuan/1000kg          | <b>14.76</b>          |
| Natural gas                         |        | 230                              | Nm <sup>3</sup> /t | 2.8        | yuan/Nm <sup>3</sup> | <b>644</b>            |
| Cost analysis                       |        |                                  |                    |            |                      | <b>3</b>              |
| maintenance costs                   |        |                                  |                    |            |                      | <b>3</b>              |
| Depreciation of<br>equipment        |        |                                  |                    |            |                      | <b>40</b>             |

|                  |  |  |  |  |  |                |
|------------------|--|--|--|--|--|----------------|
| Personnel wages  |  |  |  |  |  | <b>28.7</b>    |
| Management cost  |  |  |  |  |  | <b>10</b>      |
| operational cost |  |  |  |  |  | <b>723.875</b> |

The operational cost of waste acid regeneration process is about 1000 yuan / ton. The investigation of the industrial waste acid treatment plant has found that the source of waste acid, the type of impurity content, the initial concentration of waste acid, the concentration of finished acid, the amount of treatment, the steam used, the combustion gas and so on are the factors affecting the process combination, investment and operational cost of the treatment plant. Therefore, it is difficult to collect enough data from the completed projects in line with our task requirements.

In the following work, I intend to set the preconditions for a certain type of waste acid with a starting concentration of 45% w (H<sub>2</sub>SO<sub>4</sub>), daily treatment amount, steam, and burning gas (calorific value), and ask experts to give rough estimations based on personal experience of different final sulphuric acid concentrations, investment and operating costs.

### 3. Waste sulfuric acid treatment and vacuum concentration process and its operational cost and investment analysis

Setting up the process condition of waste sulfuric acid concentration, analyzing different final sulfuric acid concentration, its investment and operational cost

#### 1) cost estimation of waste sulfuric acid vacuum concentration process

**Tab.5 cost estimation of waste sulfuric acid vacuum concentration process**

| Primary concentration | final concentration | yield (ton / day) | CapEx (10000 yuan) | OpEx (yuan / ton) | Remarks |
|-----------------------|---------------------|-------------------|--------------------|-------------------|---------|
| 45%                   | 55%                 | 500               | 1070               | 114.3             |         |
|                       |                     | 1000              | 1800               | 112               |         |
| 45%                   | 65%                 | 500               | 1400               | 202.5             |         |
|                       |                     | 1000              | 2350               | 200               |         |
| 45%                   | 75%                 | 500               | 1550               | 286               |         |
|                       |                     | 1000              | 2630               | 283               |         |
| 45%                   | 85%                 | 500               | 1870               | 354.6             |         |
|                       |                     | 1000              | 3170               | 350               |         |
| 45%                   | 95%                 | 500               | 2670               | 450               |         |

|  |  |      |      |     |  |
|--|--|------|------|-----|--|
|  |  | 1000 | 4070 | 445 |  |
|--|--|------|------|-----|--|

3Dgraph:

cost estimation of waste sulfuric acid vacuum concentration process

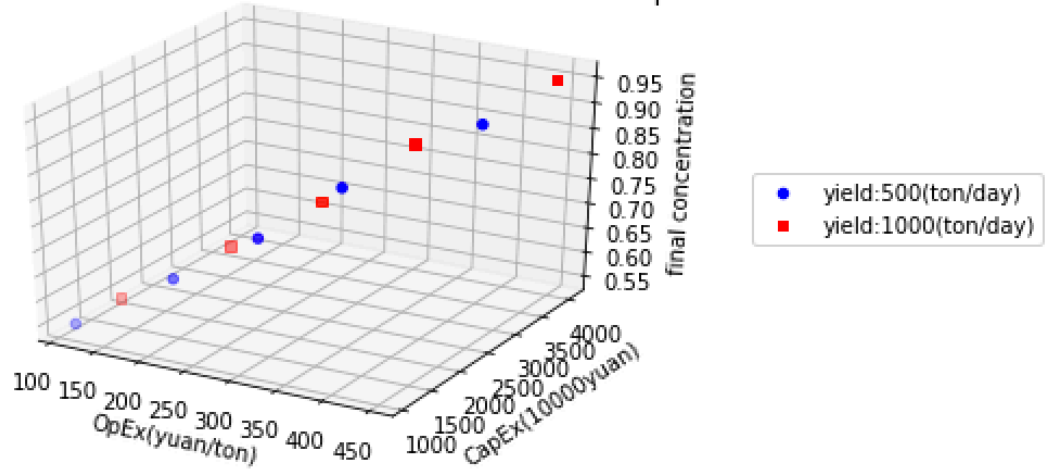

## 2) cost estimation of Spent sulphuric acid regeneration (SAR) process

The feed with 45% concentration of (H<sub>2</sub>SO<sub>4</sub>) appears to be low in concentration by Spent sulphuric acid regeneration (SAR) process method and can be concentrated first, then use SAR mode.

Because of it's high investment cost, professionals give the following suggestions and estimate the related costs for our task,.

w (H<sub>2</sub>SO<sub>4</sub>) 45% →→w (H<sub>2</sub>SO<sub>4</sub>) 65% using waste acid concentration process;

w (H<sub>2</sub>SO<sub>4</sub>) 45% →→w (H<sub>2</sub>SO<sub>4</sub>) 75% using waste acid concentration process;

w (H<sub>2</sub>SO<sub>4</sub>) 45% →→w (H<sub>2</sub>SO<sub>4</sub>) 85% using two stage concentration process.

w(H<sub>2</sub>SO<sub>4</sub>)45% →→w(H<sub>2</sub>SO<sub>4</sub>)95% using two stage concentration and regeneration process(SAR)

Tab.6 cost estimation of spent acid regeneration (SAR)processes

| Primary concentration | final concentration | yield (ton / day) | CapEx (10000 yuan) | OpEx (yuan / ton) | 备注                   |
|-----------------------|---------------------|-------------------|--------------------|-------------------|----------------------|
| 45%                   | 65%                 | 500               | 1441               | 215               | vacuum concentration |
|                       |                     | 1000              | 2420               | 212               |                      |
| 45%                   | 75%                 | 500               | 1610               | 300               | vacuum concentration |
|                       |                     | 1000              | 2720               | 297               |                      |
| 45%                   | 85%                 | 500               | 1970               | 364.6             | 2 stage              |

|     |     |      |      |     |                                                   |
|-----|-----|------|------|-----|---------------------------------------------------|
|     |     | 1000 | 3320 | 358 | vacuum concentration                              |
|     |     |      |      |     |                                                   |
| 45% | 95% | 500  | 3600 | 750 | 2 stage vacuum concentration + regeneration (SAR) |
|     |     | 1000 | 6070 | 745 |                                                   |

3Dgraph:

cost estimation of spent acid regeneration (SAR) processes

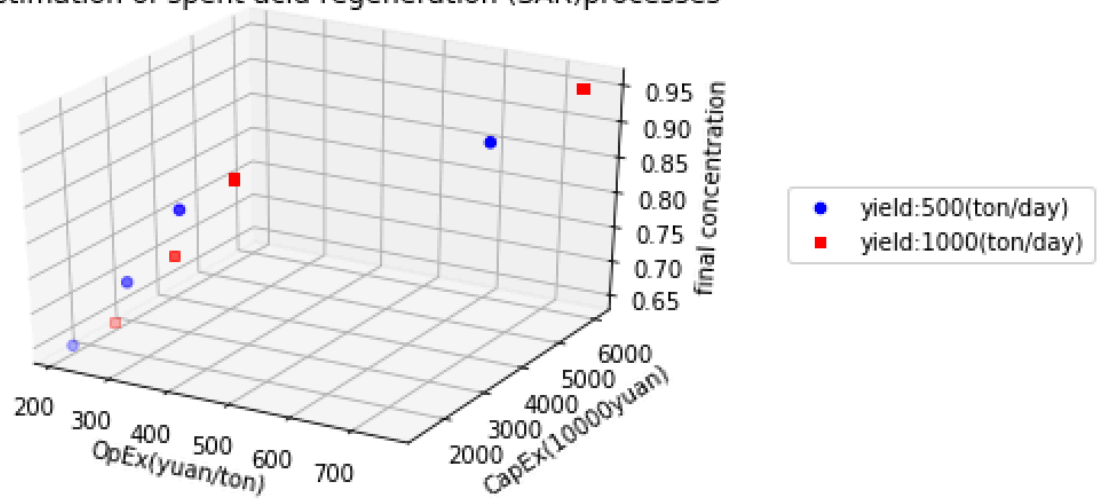

Supplement: d0ee03768k11.pdf [file d0ee03768k11.pdf]
