# Supplementary material for: Economically advantageous pathways for reducing greenhouse gas emissions from industrial hydrogen under common, current economic conditions
Source: Royal Society of Chemistry journal article supplement (doi:10.1039/d0ee03768k), 2021-01-01
Supplement: d0ee03768k15.pdf [file d0ee03768k15.pdf]

1 Supplementary Information For:  
2 Economically Advantageous Pathways for Reducing Greenhouse Gas Emissions from Industrial  
3 Hydrogen under Common, Current Economic Conditions  
4 Cody E. Finke, Hugo F. Leandri, Evody Tshijik Karumb, Neil A. Fromer, David Zheng, Michael R.  
5 Hoffmann  
6 Contents:  
7 Figures: S1-S9  
8 Tables: S1-S5  
9 Equations: S1-S7  
10 References S1-S19  
11 **CapEx of Sulfur Furnace pg 2**  
12 Fig. S1  
13 Eq. S1  
14 **CapEx and OpEx of Sulfuric Acid Concentration pg 2-4**  
15 Tables S1-2  
16 Figs. 2-3  
17 Eqs. 2-3  
18 **Voltage and Current relationships pg 4-5**  
19 Figs S4-5  
20 Eq S4-6  
21 **Voltage and Faradaic Efficiency pg 5-6**  
22 Fig. S6  
23 Eqs. S4-6  
24 **Sensitivity Analysis pg S6-10**  
25 Table 3  
26 CONUS Averages  
27 **Levelized Cost of Hydrogen production via the Steam Methane Reforming and Sulfuric Acid**  
28 **Production via the Contact Process Pg 10-12**  
29 Table S4-5  
30 Figs. S7  
31 Eq. 37  
32 **Key Technical Challenges for SE Pgs. 12-13**  
33 Poor solubility of SO<sub>2</sub> in concentrated sulfuric acid  
34 Membrane hydration issues with concentrated sulfuric acid  
35 Catalyst Fouling with Reduced Sulfur Species  
36 **Sensitivity Analysis of Grid-Assisted Sulfur Electrolysis Pgs 13-14**  
37 Figs S8-9  
38 **Model Code and Required Data**  
39 Model code is attached in the following files: amount\_SA\_capEx.m, amount\_SA\_opEx.m,  
40 cheapestNextkWhrs.m, define\_sens\_anal.m, LC\_Bat.m, LC\_PV.m, LC\_SA.m, LCH\_model.m,  
41 N212\_CDtoM.m, optimize\_PV.m, plant.m, SB\_CapEx.m, and averageYear\_shaner.mat  
42 **References**  
43

44

45

46

47

48 Some relationships below are in 2018 USD, results have been converted into 2020 USD via a standard  
49 2% inflation rate for use in the final analysis.

#### 50 **CapEx of Sulfur Furnace**

51 We estimated the CapEx of a sulfur furnace which generates electricity and separates SO<sub>2</sub> from flue gas  
52 to be the same as a contact process plant which generates electricity and separates SO<sub>2</sub> from flue gas as  
53 well as makes H<sub>2</sub>SO<sub>4</sub> thermochemically. We believe that this is a conservative estimate because the  
54 contact process has everything that our sulfur burning process needs plus downstream reactors to make  
55 oleum from SO<sub>2</sub> and sulfuric acid from oleum. We used a known CapEx and size relationship from  
56 Garret, 1989 to estimate the economics of the contact process<sup>1</sup>.

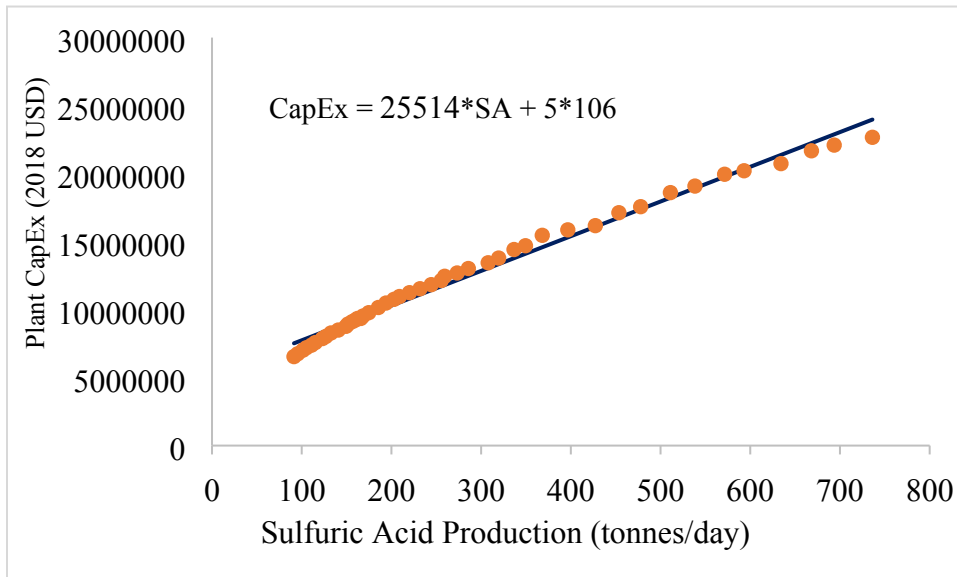

57

58 **Fig. S1: CapEx of a sulfuric acid data.** CapEx of contact process plants versus sulfuric acid production  
59 rate (orange dotted line), overlaid with the best linear fit (blue solid line)<sup>1</sup>.

60 The relationship from the above graph may be found in equation S1. In Equation S1, SA is sulfuric acid  
61 production per day in metric tonnes and CapEx is overnight capital expenditure in 2018 USD.

$$62 \text{ CapEx} = 25514 \cdot \text{SA} + 5 \cdot 10^6 \quad (\text{S1})$$

63 A linear fit is conservative because plants tend to get cheaper per unit production with scale.

#### 64 **CapEx and OpEx of Sulfuric Acid Concentration**

65 To determine the cost of electrochemical concentration of sulfuric acid, we modeled a sulfuric acid  
66 concentration process using real OpEx and CapEx data for a vacuum concentration process provided via  
67 personal correspondence with a senior manager at a Nanjing sulfuric acid vacuum concentration plant  
68 owned by Sinopec Nanjing Chemical Industry Co. Ltd (correspondence may be found in the pdf labeled

69 *NanjingCorrespondence\_report.pdf*). Data used for CapEx may be found in table S1. This plant  
70 concentrates sulfuric acid to 96%.

71  
72  
73  
74  
75  
76

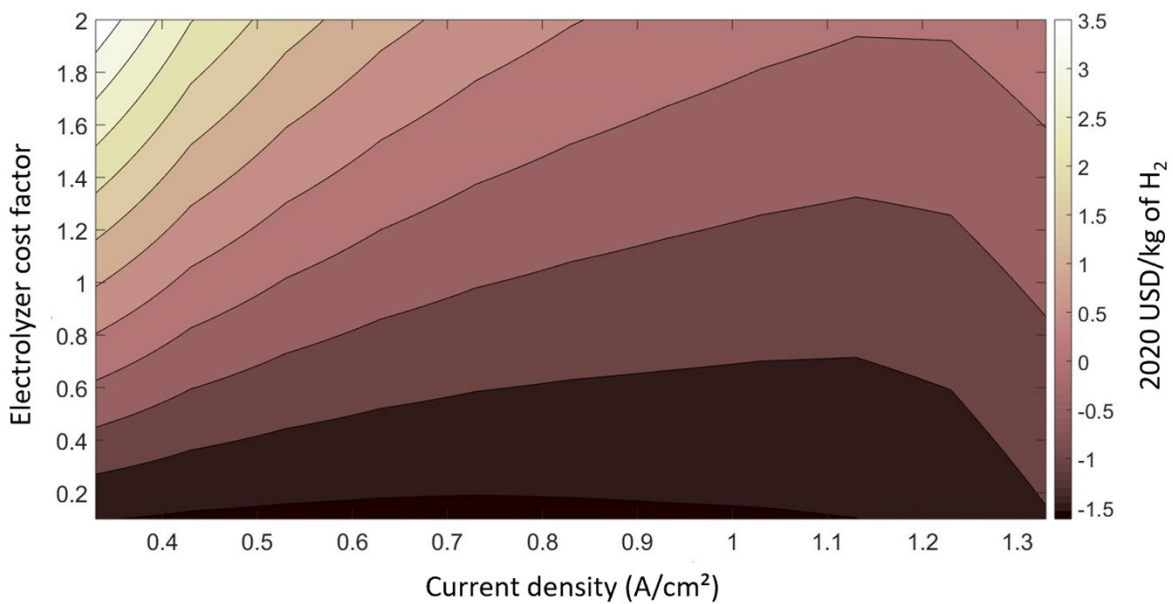

77

78 **Fig. S2:** A heatmap of the price of hydrogen for several different operating current densities and  
79 electrolyzer CapEx costs. Electrolyzer cost factor is a unitless value which is the multiplication  
80 factor on the standard assumed price for an electrolyzer where 0.1 is 10X cheaper than a standard  
81 assumption electrolyzer and 2 is 2X more expensive than a standard assumption electrolyzer.  
82 Balance of system and catalyst costs per electrolyzer remained constant. Each electrolyzer cost  
83 factor corresponds to a different cheapest operating current density.

84

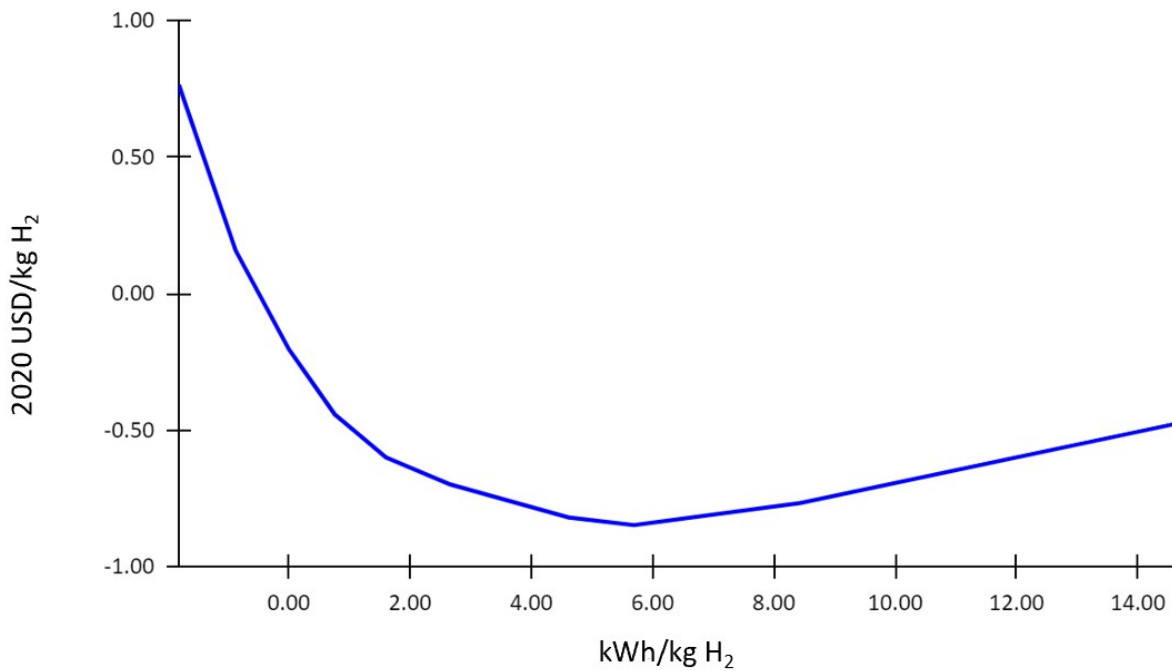

85

86

87 **Fig. S3:** Relationship between excess energy required beyond what was available from burning  
 88 sulfur assuming a 30% conversion efficiency vs the cost of hydrogen. The primary control on  
 89 energy consumption is the operating voltage of the electrolyzer. As operating voltage and current  
 90 density (e.g. kWh per kg H<sub>2</sub>) decreases, so does energy requirement per kg H<sub>2</sub>, but the number of  
 91 electrolyzers needed to make a given amount of hydrogen increases.

92

93 **Table S1:** CapEx for sulfuric acid concentration

| Plant Size (tonnes H <sub>2</sub> SO <sub>4</sub> / dy) | CapEx (2018 USD) |
|---------------------------------------------------------|------------------|
| 0.018                                                   | 30,000           |
| 1.45                                                    | 125,000          |
| 72                                                      | 1,595,000        |
| 500                                                     | 3,814,286        |
| 1,000                                                   | 5,814,286        |

94 Data in table S1 were graphed in fig. S2 to find the empirical relationship in equation S2.

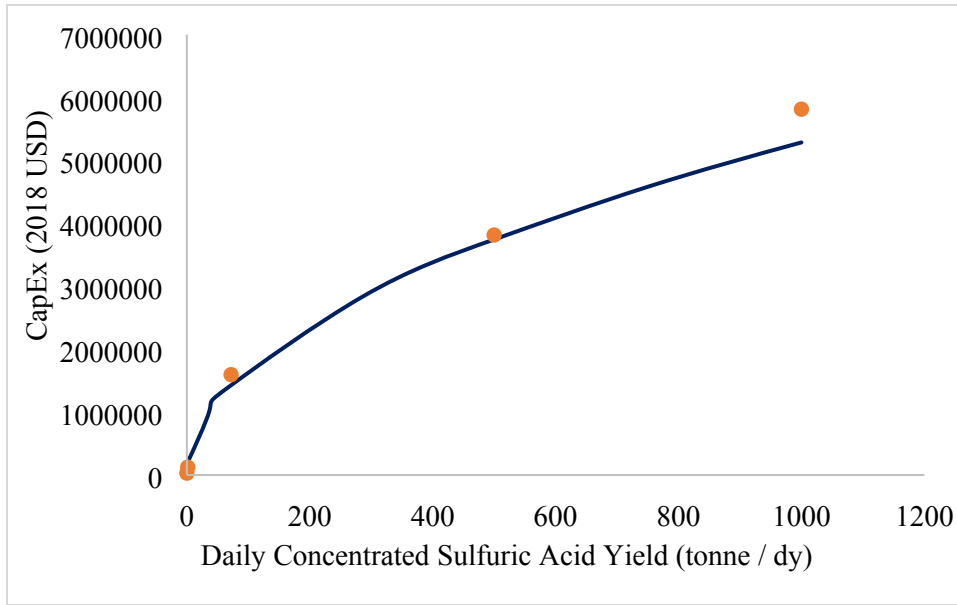

95

96 **Fig. S4. CapEx of Sulfuric Acid Vacuum Concentration Plants.** The best fit relationship between  
 97 CapEx and Sulfuric Acid yield for a concentration plant (data from table S1). While this best fit line may  
 98 be an underestimate of sulfuric acid concentration CapEx.

99 The relationship between CapEx and OpEx is in Eq. S2 where CapEx is the capital expenditure and SA is  
 100 the amount of sulfuric acid produced in tonnes/day.

101 
$$\text{CapEx} = 17,000 * \text{SA}^{0.5} \quad (\text{S2})$$

102 OpEx data for this process may be found in table S2 below.

103

104

105

106

107

108

109

110 **Table S2:** Sulfuric acid concentration OpEx.

| Initial Concentration of H <sub>2</sub> SO <sub>4</sub> (%) | OpEx (\$ / tonne H <sub>2</sub> SO <sub>4</sub> ) |
|-------------------------------------------------------------|---------------------------------------------------|
| 45                                                          | 56.25                                             |
| 55                                                          | 42.25                                             |
| 65                                                          | 31.25                                             |
| 75                                                          | 20.88                                             |
| 85                                                          | 12.50                                             |

111

112 Data in table S2 were graphed in fig. S3 to find the empirical relationship in equation S3.

113

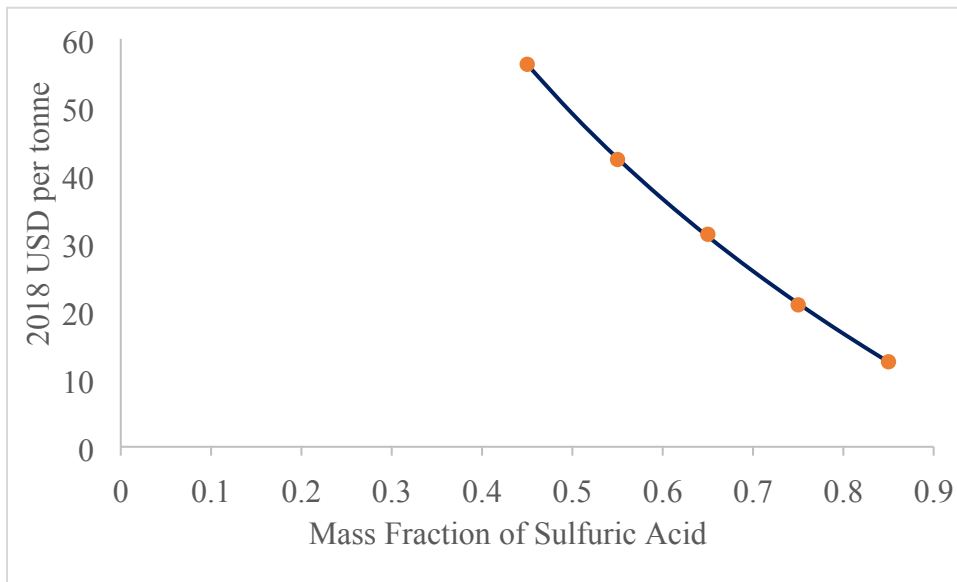

114

115 **Fig. S5. OpEx of Sulfuric Acid Vacuum Concentration Plants.** OpEx for sulfuric acid concentration  
116 from table S2. Sulfuric acid was concentrated from an initial concentration to 96%.

117 The relationship between OpEx and sulfuric acid concentration is in Eq. S3 where OpEx is the OpEx per  
118 tonne sulfuric acid and C is the concentration of sulfuric acid in percent mass.

119 
$$\text{OpEx} = -1.2443 * C + 118.16 \quad (\text{S3})$$

120 **Voltage and Current relationships**

121 Sulfur and water electrolysis voltage and current density data were fit from real SDE data.

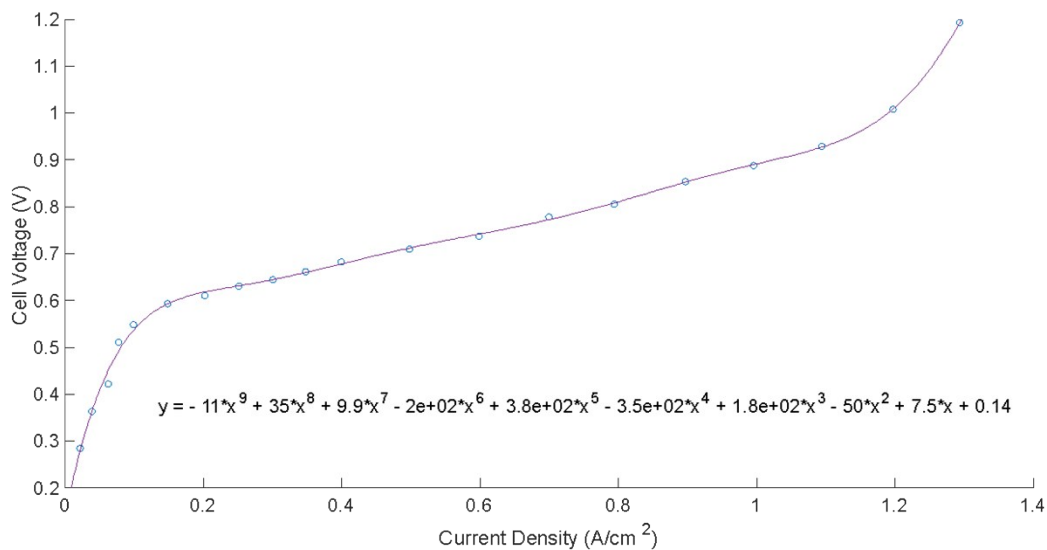

122

123 **Fig. S6. Voltage and Current Relationship for an SDE.** Data interpolation of a real lab scale sulfur  
124 depolarization electrolyzer<sup>2</sup>. The interpolated relationship can be found in Eq. S4.

125 The empirical relationship between cell voltage (V) and current density (CD) are in equation S4.

126  $V =$

$$127 - 10.642 \cdot CD^9 + 35.299 \cdot CD^8 + 9.8505 \cdot CD^7 - 200.7 \cdot CD^6 + 379.95 \cdot CD^5 - 346.31 \cdot CD^4 + 175.38 \cdot CD^3 -$$
$$128 49.626 \cdot CD^2 + 7.5476 \cdot CD + 0.13509 \quad (S4)$$

129

130 A voltage shift to account for different starting concentrations of sulfuric acid was used.

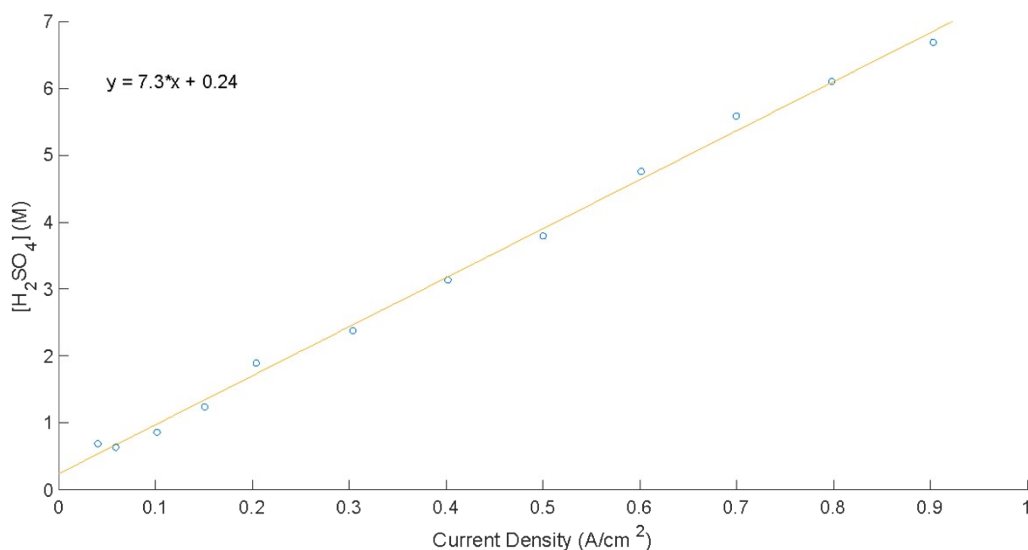

131

132

133 **Fig. S7. Graph showing fit of sulfuric acid concentration.** Data interpolation of a real lab scale sulfur  
134 depolarization electrolyzer<sup>2</sup>. The interpolated relationship can be found in Eq. S5.

135

136 The empirical relationship between cell sulfuric acid concentration in molar (SA) and current density

137 (CD) may be found in Eq. S6 below. These data were used to determine the concentration of sulfuric acid  
138 that was output for a given current density.

$$139 SA = 7.3 \cdot CD + 0.24 \quad (S5)$$

140

141 A voltage shift ( $\Delta V$ ) for different concentrations of sulfuric acid and solubility of SO<sub>2</sub> was applied to the  
142 equation based on an empirical relationship of applied potential vs acid concentration derived by Weidner  
143 et al, this relationship can be found in Eq. S6 where the shift is cell voltage relative to a water electrolyte  
144 is  $\Delta V$  versus the concentration of sulfuric acid in molar (SA).

145

$$146 \Delta V = 0.00052 \cdot SA^3 - 0.0087 \cdot SA^2 + 0.07 \cdot SA + 0.084 \quad (S6)$$

147

### 148 Voltage and Faradaic Efficiency

149

150 For both SE and WE the current density was corrected for faradic efficiency based on voltage from the  
151 below graph<sup>3</sup>.

152

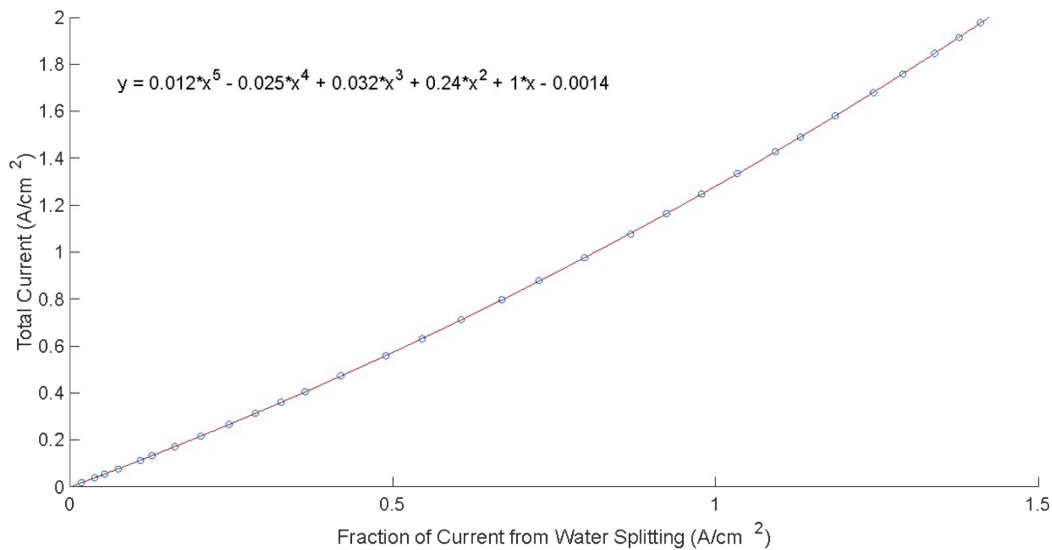

153  
154

155 **Fig. S8 Graph showing faradic efficiency for a water electrolysis system.** The fraction of current from  
156 water splitting is the total current corrected to have 100% faradaic efficiency.

157

158 **Sensitivity Analysis**

159 **Table S3:** Annotated sensitivity analysis parameters.

160

| Variable                                    | Low Value | High Value | Standard Assumption | Discussion                                                                                                                                                                  |
|---------------------------------------------|-----------|------------|---------------------|-----------------------------------------------------------------------------------------------------------------------------------------------------------------------------|
| <i>Inputs and Outputs</i>                   |           |            |                     |                                                                                                                                                                             |
| H <sub>2</sub> Produced <sup>a</sup>        | 1,000     | 400,000    | 400,000             | 1000 kg H <sub>2</sub> / dy is the H2A forecourt assumption while 400,000 kg H <sub>2</sub> / dy is the H2A centralized assumption <sup>4</sup> .                           |
| Buying Price of Sulfur <sup>c</sup>         | -0.1      | 0.45       | 0.13                | This price range was taken from Bloomberg industrial analysis of high and low prices for sulfur. The standard price 2017 West Coast USA contract pricing <sup>5</sup> .     |
| Selling Price of Sulfuric Acid <sup>d</sup> | 0.05      | 0.33       | 0.143               | This price range was taken from Bloomberg industrial analysis of high and low prices for sulfuric acid. The standard assumption price was the price for 2017 West Coast USA |



|                                                                 |       |      |      |                                                                                                                                                                                                                |
|-----------------------------------------------------------------|-------|------|------|----------------------------------------------------------------------------------------------------------------------------------------------------------------------------------------------------------------|
|                                                                 |       |      |      | contract pricing <sup>5</sup> .                                                                                                                                                                                |
| Buying Price of Grid Electricity <sup>e</sup>                   | 0.1   | 0.3  |      | High and low US energy information administration (EIA) prices. The standard price is the average US industrial price of electricity <sup>6</sup> .                                                            |
| Selling Price of Grid Electricity <sup>e</sup>                  | 0.005 | 0.18 | 0.07 | High and low US energy information administration (EIA) prices <sup>6</sup> .                                                                                                                                  |
| <i>Catalyst Parameters and Components</i>                       |       |      |      |                                                                                                                                                                                                                |
| SE <sup>l</sup> Catalyst Geometric Current Density <sup>b</sup> | 0.33  | 1.5  | 1.21 | The ranges for SE and WE were taken from real data on either a highly advanced prototype (SE) <sup>2</sup> or a commercial prototype (WE) <sup>3</sup> . All values were corrected to 100% faradaic efficiency |
| WE <sup>m</sup> Catalyst Geometric Current Density <sup>b</sup> | 0.33  | 1.5  | 1.48 | The ranges for SE and WE were taken from real data on either a highly advanced prototype (SE) <sup>2</sup> or a commercial unit (WE) <sup>3</sup> . All values were corrected to 100% faradaic efficiency      |
| Voltage Shift <sup>g</sup>                                      | -1.0  | 1    | 0    | Shifting the voltage for a given current density up or down by a volt represents incredibly large changes in the quality of the catalyst <sup>7</sup> .                                                        |
| Catalyst CapEx Cost Coefficient                                 | 0.1   | 1    | 1    | An order of magnitude increase or decrease would be a very large change.                                                                                                                                       |
| Catalyst Lifetime <sup>i</sup>                                  | 1     | 21   | 7    | For the chlor-alkali process, the catalyst lifetime is around 7 years <sup>7</sup> . 7 years is also the H2A assumption.                                                                                       |

|                                        |      |     |      |                                                                                                                                                                                                                                                                                                                                                                                                                                                                                      |
|----------------------------------------|------|-----|------|--------------------------------------------------------------------------------------------------------------------------------------------------------------------------------------------------------------------------------------------------------------------------------------------------------------------------------------------------------------------------------------------------------------------------------------------------------------------------------------|
|                                        |      |     |      | For the high value we chose 21 years, which, to the knowledge of the authors, has not been attained. This high value would require no membrane replacement during the plant lifetime so therefore it would maximally reduce cost. We believe that showing the maximally impactful value could help scientists understand the maximum potential impact of their research work and therefore motivate their studies. Less than 1 year would be a very unstable catalyst <sup>4</sup> . |
| Catalyst Faradic Efficiency Factor     | 0.1  | 10  | 1    | An order of magnitude increase or decrease would be a very large change.                                                                                                                                                                                                                                                                                                                                                                                                             |
| <i>PV Parameters and Components</i>    |      |     |      |                                                                                                                                                                                                                                                                                                                                                                                                                                                                                      |
| PV Nameplate Peak Power <sup>f</sup>   | 0.1  | 0.5 | 0.16 | 0.16 kW/m <sup>2</sup> is a common solar peak power density. 0.5 kW/m <sup>2</sup> is a common research goal for PV researchers <sup>8</sup> .                                                                                                                                                                                                                                                                                                                                       |
| PV Balance of Systems Cost Coefficient | 0.1  | 1   | 1    | An order of magnitude increase or decrease would be a very large change.                                                                                                                                                                                                                                                                                                                                                                                                             |
| PV Module Cost Coefficient             | 0.1  | 1   | 1    | An order of magnitude increase or decrease would be a very large change.                                                                                                                                                                                                                                                                                                                                                                                                             |
| <i>Battery Components</i>              |      |     |      |                                                                                                                                                                                                                                                                                                                                                                                                                                                                                      |
| Battery Module Cost Coefficient        | 0.1  | 1   | 1    | An order of magnitude increase or decrease would be a very large change.                                                                                                                                                                                                                                                                                                                                                                                                             |
| Battery Balance of                     | 0.01 | 1   | 1    | An order of                                                                                                                                                                                                                                                                                                                                                                                                                                                                          |

|                                                   |      |      |      |                                                                                                                                                                                                                                                                                                          |
|---------------------------------------------------|------|------|------|----------------------------------------------------------------------------------------------------------------------------------------------------------------------------------------------------------------------------------------------------------------------------------------------------------|
| Systems Cost Coefficient                          |      |      |      | magnitude increase or decrease would be a very large change.                                                                                                                                                                                                                                             |
| <i>Economic and Operating Parameters</i>          |      |      |      |                                                                                                                                                                                                                                                                                                          |
| Capacity Factor                                   | 0.01 | 0.97 | 0.97 | A capacity factor of 97% is the H2A assumption <sup>4</sup> .                                                                                                                                                                                                                                            |
| Rate of Return                                    | 0.05 | 0.20 | 0.12 | A 12% rate of return is a high rate of return value that represents a large fraction of equity investment vs debt investment and has been used in previous conservative studies <sup>9</sup> .                                                                                                           |
| Carbon Tax <sup>j</sup>                           | 0    | 1    | 0.00 | 0 represents no tax on carbon while 1 represents \$1000/tonne which is very high tax on carbon, most proposed taxes are much lower <sup>10</sup> .                                                                                                                                                       |
| Carbon Intensity of Grid Electricity <sup>k</sup> | 0    | 1    | 0.29 | 0.29 is the carbon intensity of the US grid. 1 kg CO <sub>2</sub> / kWhr would represent wood burning or very dirty coal based electricity generation <sup>11</sup> .                                                                                                                                    |
| Initial Sulfuric Acid Concentration <sup>h</sup>  | 0.0  | 18.0 | 10.0 | The higher the initial sulfuric acid concentration, the higher the final concentration can be based on the solubility of SO <sub>2</sub> and the flow rate in demonstrated reactors, 18.0 M H <sub>2</sub> SO <sub>4</sub> is 98% sulfuric acid which is the highest grade concentration <sup>12</sup> . |
| <i>Electrolyzer Components</i>                    |      |      |      |                                                                                                                                                                                                                                                                                                          |
| Electrolyzer Balance of Systems Cost Coefficient  | 0.1  | 1    | 1    | An order of magnitude increase or decrease would be a                                                                                                                                                                                                                                                    |

|                               |     |   |   |                                                                          |
|-------------------------------|-----|---|---|--------------------------------------------------------------------------|
|                               |     |   |   | very large change.                                                       |
|                               |     |   |   | An order of magnitude increase or decrease would be a very large change. |
| Electrolyzer Cost Coefficient | 0.1 | 1 | 1 |                                                                          |

161

162 Note. <sup>a</sup> kg / dy <sup>b</sup> A / cm<sup>2</sup> <sup>c</sup> % / kg <sup>d</sup> \$ / kg <sup>e</sup> \$ / kWhr <sup>f</sup> kW / m<sup>2</sup> peak power <sup>g</sup> V <sup>h</sup> M <sup>i</sup> 7 yrs <sup>j</sup> \$ / kg CO<sub>2</sub> <sup>k</sup> Kg

163 CO<sub>2</sub> / kg kWhr. <sup>l</sup> Sulfur Electrolysis <sup>m</sup> Water Electrolysis.

164

## 165 CONUS Averages

166 The CONUS spatial average of insolation data introduces limitations because it includes places  
167 where solar panels can clearly not be utilized (e.g. National Parks). Additionally, highly sunny  
168 places like the US desert Southwest may allow for higher penetrations of solar at a cheaper price  
169 of energy while more cloudy places like the east coast of the US may deliver more expensive  
170 energy. To address these issues, we varied the cost and efficiency of solar in our sensitivity  
171 analysis. Standard assumption values for energy production are shown in table 2.

172

## 173 Levelized Cost of Hydrogen production via the Steam Methane Reforming and Sulfuric Acid

### 174 Production via the Contact Process

175

176 CapEx and OpEx data for an SMR plant that produces 341,448 kg/dy H<sub>2</sub> were taken directly from the  
177 National Renewable Energy Laboratory H2A model. These numbers were plugged into our LCH equation  
178 to determine an LCH from SMR under the same assumptions. The resulting LCH was \$1.25 in 2018  
179 USD, ten cents higher than the H2A value. A summary of OpEx and CapEx can be found in Table S4.

180

181 **Table S4:** Tabulated CapEx and OpEx values from the H2A study adjusted to 2018 USD using 2%  
182 annual inflation.

183

|                                |                             |                      |
|--------------------------------|-----------------------------|----------------------|
| Plant Parameters               |                             |                      |
|                                | Plant Lifetime <sup>a</sup> | 40                   |
|                                | Plant Output <sup>b</sup>   | 341,448              |
| OpEx <sup>c</sup>              |                             |                      |
|                                | Variable OpEx               | \$9,260,972          |
|                                | Fixed OpEx                  | \$65,746,517         |
|                                | Unplanned Maintenance       | \$1,265,773          |
|                                | Scheduled Maintenance       | \$1,289,823          |
| <b>Total OpEx<sup>c</sup></b>  |                             | <b>\$77,563,087</b>  |
| CapEx <sup>d</sup>             |                             |                      |
|                                | Plant CapEx                 | \$258,537,342        |
| <b>Total CapEx<sup>d</sup></b> |                             | <b>\$258,537,342</b> |

184 Notes: <sup>a</sup>years <sup>b</sup>kg H<sub>2</sub>/day <sup>c</sup>2018 USD/yr <sup>d</sup>2018 USD

185 CapEx and OpEx data were taken from a previous analysis where CapEx was estimated using Fig. S1 and  
186 converted into 2018 USD<sup>13</sup>. Wages were converted into an average chemical plant engineer wages in the  
187 US and sulfur and sulfuric acid prices and associated laboratory, supervision, and overhead costs were  
188 adjusted for consistent assumptions (laboratory costs: 23 % of operating labor, supervision: 20% of

189 operating labor, and plant overheads: 50% operating labor)<sup>13</sup>. We then plugged these CapEx and OpEx  
 190 assumptions in eq. 4 from the main text assuming a 12% rate of return. It was found that the levelized cost  
 191 of sulfuric acid was \$0.139/kg H<sub>2</sub>SO<sub>4</sub> or \$10.36 for the 49 kg H<sub>2</sub>SO<sub>4</sub> that would be co-generated with a kg  
 192 of H<sub>2</sub> via SMR. Data used for this analysis is shown in table S4 below. All labor costs were scaled by a  
 193 ratio of the cost of the 216 tonne/dy H<sub>2</sub>SO<sub>4</sub> plant from the reference to the size of the plant we modeled  
 194 herein. Consumable materials costs were scaled by the ratio of the produced sulfuric acid. Sulfur prices  
 195 were set at \$130/tonne consistent with assumptions in our model.  
 196

197 **Table S5:** Tabulated CapEx and OpEx values were adjusted to 2018 USD using 2% annual inflation<sup>13</sup>.  
 198

| Plant Parameters                       |                      |
|----------------------------------------|----------------------|
| Plant Lifetime <sup>a</sup>            | 20                   |
| Plant Output <sup>b</sup>              | 9,817                |
| Variable OpEx <sup>c</sup>             |                      |
| Sulfur (3,200 MTPD)                    | \$152,106,074        |
| Electricity                            | \$53,971,581         |
| Heating oil                            | \$30,487,096         |
| Steam                                  | \$201,524,876        |
| Other Utilities                        | \$29,160,096         |
| Catalyst                               | \$2,389,128          |
| <b>Total Variable OpEx<sup>c</sup></b> | <b>\$268,113,977</b> |
| Fixed OpEx <sup>c</sup>                |                      |
| Maintenance                            | \$25,547,094         |
| Operating Labor                        | \$31,190,845         |
| Laboratory Costs                       | \$7,173,894          |
| Supervision Cost                       | \$6,238,169          |
| Plant Overheads                        | \$15,595,422         |
| Executive Wages                        | \$925,622            |
| Indirect OpEx <sup>c</sup>             |                      |
| Indirect OpEX                          | \$166,892,970        |
| <b>Total OpEx<sup>c</sup></b>          | <b>\$253,564,016</b> |
| Capital Expenditure <sup>d</sup>       |                      |
| Plant CapEx                            | \$215,371,424        |
| Catalyst capex                         | \$40,099,514         |
| <b>Total CapEx<sup>d</sup></b>         | <b>\$255,470,938</b> |

199 Notes: <sup>a</sup>years <sup>b</sup>tonnes H<sub>2</sub>SO<sub>4</sub>/day <sup>c</sup>2018 USD/yr <sup>d</sup>2018 USD

## 200 Comparison to Water Electrolysis

201 We input model conditions from literature into our model and found good agreement with our model and  
 202 literature models (Table S6)<sup>14-16</sup>.

203 **Table S6: Model validation of water electrolysis. Input conditions from other analyses which used**  
 204 **regionally specific locations.** CF means Capacity Factor of the plant, r means discount rate, and the  
 205 electricity price is the production price of energy less any indicated subsidy.

| Condition                                                      | LCH from<br>Citation<br>(\$/kg H <sub>2</sub> ) | This Paper<br>LCH (\$/kg H <sub>2</sub> ) |
|----------------------------------------------------------------|-------------------------------------------------|-------------------------------------------|
| 35% CF, \$0.01/kWh (\$0.023/kWh subsidy), r = 4% <sup>16</sup> | 3.23                                            | 3.46                                      |

99% CF, \$0.024/kWh, r = 10%<sup>15</sup>  
34% CF, r = 5.75%<sup>14</sup>

2.93                      3.03  
3.60-4.72                3.95-4.94

206

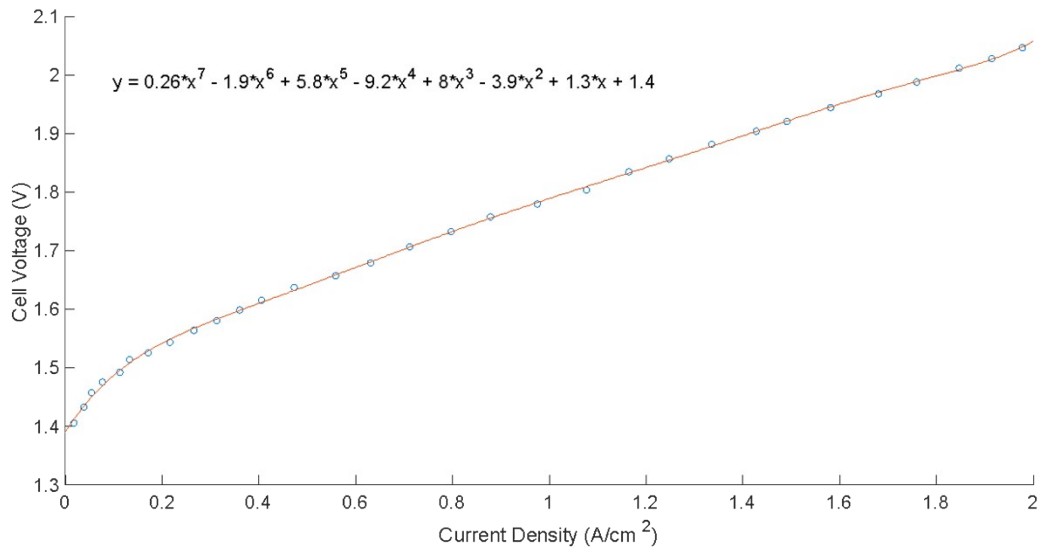

208 **Fig. S9. Graph of WE Voltage and Current Density Relationship.** Data interpolation of a real  
209 industrial scale water electrolyzer<sup>3</sup>. The interpolated relationship can be found in Eq. S7.

210 The empirical relationship between cell voltage (V) and current density (CD) may be found below.

211  $V = 0.26*CD^7 - 1.9*CD^6 + 5.8*CD^5 - 9.2*CD^4 + 8*CD^3 - 3.9*CD^2 + 1.3*CD + 1.4$  (S7)  
212

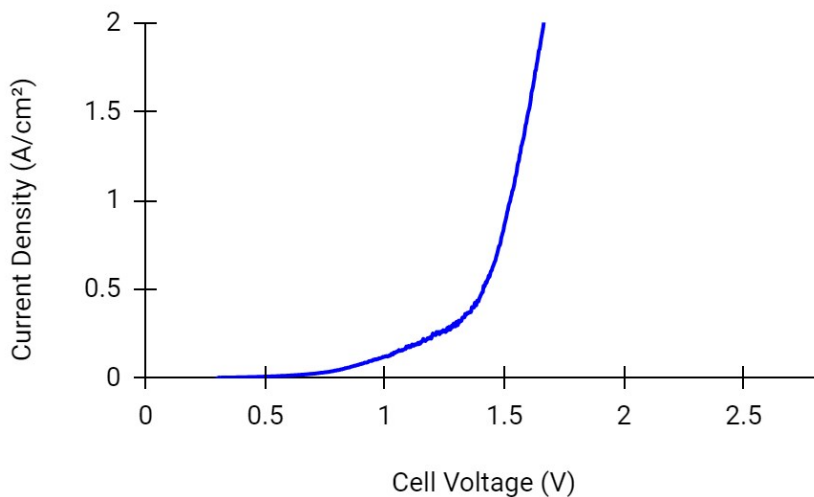

213

214 **Fig. S10:** Current-voltage curve for a molten sulfur electrolyzer.

215

216 **Key Technical Challenges for SE**

217 *Poor solubility of SO<sub>2</sub> in concentrated sulfuric acid*

218 Reaching the valuable >65% sulfuric acid concentrations purely electrochemically in all demonstrated  
219 SDEs known to these authors requires, at some point in the flow cell, dissolution of SO<sub>2</sub> in highly  
220 concentrated sulfuric acid<sup>2,12,17</sup>. The solubility of SO<sub>2</sub> decreases with increased sulfuric acid concentration  
221 which leads to increased cell voltages. Engineering controls which increase the activity of SO<sub>2</sub>, possibly  
222 using a gas diffusion electrode or temperature controls, may further reduce the cost of SE. In this model,  
223 demonstrated data was used which accounted for this solubility, however further stability testing may be  
224 necessary to determine how important SO<sub>2</sub> concentration is in the long term.

225 *Membrane hydration issues with concentrated sulfuric acid*

226 When >40% sulfuric acid concentrations exist in the electrolyzer, the membrane which is necessary to  
227 prevent wasteful redox shuttling, may dehydrate and therefore become highly resistive. Two strategies  
228 have been used in the literature to account for this, one is using membranes that do not depend heavily on  
229 hydration (e.g. polybenzimidazole type membranes) or ensuring that the pressure in the catholyte  
230 chamber is higher than the pressure in the anolyte chamber thus forcing hydration of the membrane<sup>18,19</sup>.  
231 Production of sulfuric acid in >90% sulfuric acid has been demonstrated in these systems, however, only  
232 at very high overpotentials, low current densities, and for short times and more testing and engineering is  
233 likely necessary to determine if this is actually feasible therefore we decided to not include the  
234 electrochemical production of >90% sulfuric acid in our model<sup>20</sup>.

235 *Catalyst Fouling with Reduced Sulfur Species*

236 Elemental sulfur may plate on catalysts both reductively and oxidatively. If there is leakage of SO<sub>2</sub> across  
237 the membrane, SO<sub>2</sub> may reduce to S<sub>x</sub> and block active sites on the cathode. In the anodic chamber, if any  
238 (poly)sulfides are present in solution, these may oxidatively plate out on the anode as S<sub>x</sub>, again causing  
239 fouling<sup>21</sup>. Certainly, membrane integrity and oxygen pressure in the furnace should be controlled  
240 precisely to prevent SO<sub>2</sub> in the catholyte and (poly)sulfides in the anolyte. In this analysis we assumed  
241 that catalyst fouling was well controlled and catalyst replacement was only necessary once every seven  
242 years. No sulfur electrolysis system has been run for this long, however, so we used the chlor-alkali  
243 process as a guide. Under these assumptions, our catalyst and membranes were replaced once every seven  
244 years.

245 **Sensitivity Analysis of Grid-Assisted Sulfur Electrolysis**

246 Even though grid-assisted SE is cheaper than SMR under standard model assumptions, we applied a  
247 sensitivity analysis to understand how technology improvements could impact cost (fig. S11).

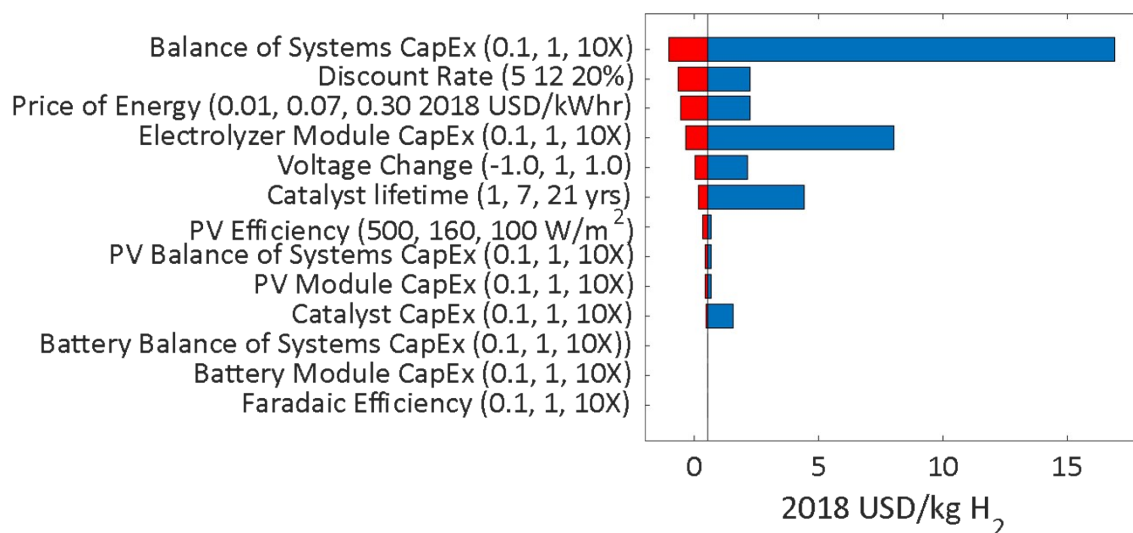

248

249 **Fig S11. Sensitivity Analysis of Solar-Only Water Electrolysis.** The parenthetical numbers on the  
 250 vertical axis indicate the low, standard, and high assumption for each case.

251

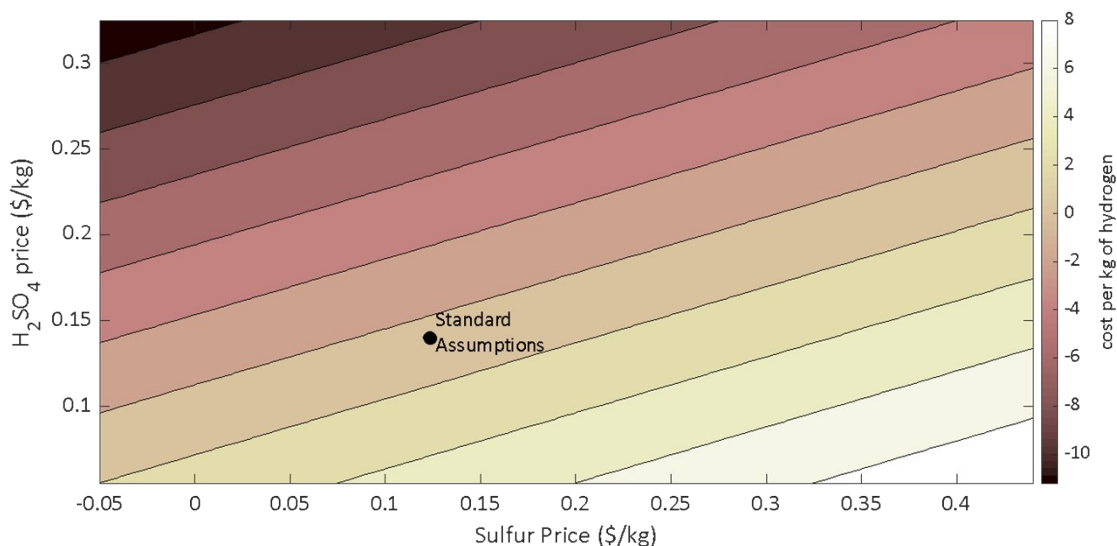

252

253 **Fig. S12. Sulfur and Sulfuric Acid Sensitivity Analysis.** Plot of the price of hydrogen minus a sulfuric  
 254 acid credit. Black contours are every \$2. The black circle indicates the price of hydrogen under standard  
 255 model assumptions (\$0.52).

256 **Correspondence with Sinopec Nanjing Chemical Company May be found in the pdf labeled:**  
 257 **NanjingCorrespondence\_report.pdf.**

258 **All code for this model has been uploaded to the repository.**

259

260 **References**



- 261 1. Garrett, D. E. *Chemical Engineering Economics*. (Springer Netherlands, 1989). doi:10.1007/978-94-  
262 011-6544-0.
- 263 2. Weidner, J. W. Electrolyzer performance for producing hydrogen via a solar-driven hybrid-sulfur  
264 process. *J. Appl. Electrochem.* **46**, 829–839 (2016).
- 265 3. Millet, P. *et al.* Implementation of Cobalt Clathrochelates in Polymer Electrolyte Water Electrolysers  
266 for Hydrogen Evolution. *Chem. Eng. Trans.* **41**, 325–330 (2014).
- 267 4. H2A: Hydrogen Analysis Production Models | Hydrogen and Fuel Cells | NREL.  
268 <https://www.nrel.gov/hydrogen/h2a-production-models.html>.
- 269 5. Green Markets. *Green Markets* <https://fertilizerpricing.com/pricing-news/green-markets/>.
- 270 6. Electric Power Monthly - U.S. Energy Information Administration (EIA).
- 271 7. O'Brien, T. F., Bommaraju, T. V. & Hine, F. *Handbook of Chlor-Alkali Technology: Volume I:*  
272 *Fundamentals, Volume II: Brine Treatment and Cell Operation, Volume III: Facility Design and*  
273 *Product Handling, Volume IV: Operations, Volume V: Corrosion, Environmental Issues, and Future*  
274 *Developments*. (Springer US, 2005). doi:10.1007/b113786.
- 275 8. Shaner, M. R., Davis, S. J., Lewis, N. S. & Caldeira, K. Geophysical constraints on the reliability of  
276 solar and wind power in the United States. *Energy Environ. Sci.* **11**, 914–925 (2018).
- 277 9. Shaner, M. R., Atwater, H. A., Lewis, N. S. & McFarland, E. W. A comparative technoeconomic  
278 analysis of renewable hydrogen production using solar energy. *Energy Environ. Sci.* **9**, 2354–2371  
279 (2016).
- 280 10. Carbon taxes: a review of experience and policy design considerations: *Climate Policy*: Vol 11, No 2.  
281 <https://www.tandfonline.com/doi/abs/10.3763/cpol.2010.0093?journalCode=tcpo20>.
- 282 11. Frequently Asked Questions (FAQs) - U.S. Energy Information Administration (EIA).  
283 <https://www.eia.gov/tools/faqs/faq.php>.
- 284 12. Gorenssek, M. B., Staser, J. A., Stanford, T. G. & Weidner, J. W. A thermodynamic analysis of the  
285 SO<sub>2</sub>/H<sub>2</sub>SO<sub>4</sub> system in SO<sub>2</sub>-depolarized electrolysis. *Int. J. Hydrog. Energy* **34**, 6089–6095 (2009).

- 286 13. Subasgar Kumareswaran *et al.* Design of a Plant to Manufacture Sulfuric Acid from Sulfur. (2013)  
287 doi:10.13140/RG.2.1.1083.2724.
- 288 14. Yates, J. *et al.* Techno-economic Analysis of Hydrogen Electrolysis from Off-Grid Stand-Alone  
289 Photovoltaics Incorporating Uncertainty Analysis. *Cell Rep. Phys. Sci.* **1**, 100209 (2020).
- 290 15. Nguyen, T., Abdin, Z., Holm, T. & Mérida, W. Grid-connected hydrogen production via large-scale  
291 water electrolysis. *Energy Convers. Manag.* **200**, 112108 (2019).
- 292 16. Glenk, G. & Reichelstein, S. Economics of converting renewable power to hydrogen. *Nat. Energy* **4**,  
293 216–222 (2019).
- 294 17. Corgnale, C. & Summers, W. A. Solar hydrogen production by the Hybrid Sulfur process. *Int. J.*  
295 *Hydrog. Energy* **36**, 11604–11619 (2011).
- 296 18. Jayakumar, J. V. *et al.* Polybenzimidazole Membranes for Hydrogen and Sulfuric Acid Production in  
297 the Hybrid Sulfur Electrolyzer. *ECS Electrochem. Lett.* **1**, F44 (2012).
- 298 19. Opperman, H., Kerres, J. & Krieg, H. SO<sub>2</sub> crossover flux of Nafion® and sFS-PBI membranes using  
299 a chronocoulometric (CC) monitoring technique. *J. Membr. Sci.* **415–416**, 842–849 (2012).
- 300 20. Kodera, F., Kuwahara, Y., Nakazawa, A. & Umeda, M. Electrochemical corrosion of platinum  
301 electrode in concentrated sulfuric acid. *J. Power Sources* **172**, 698–703 (2007).
- 302 21. Implementing Heterogeneous Catalytic Dechlorination Technology for Remediating TCE-  
303 Contaminated Groundwater | Environmental Science & Technology.  
304 <https://pubs.acs.org/doi/abs/10.1021/es8014919>.  
305  
306
